1 **The selection of antibiotic- and bacteriophage-resistant *Pseudomonas aeruginosa* is**  
2 **prevented by their combination**

3

4 Aude A Ferran,<sup>a</sup> Marlène Z. Lacroix,<sup>a</sup> Ophélie Gourbeyre,<sup>a,b</sup> Alicia Huesca,<sup>a</sup> Baptiste  
5 Gaborieau,<sup>b,c,d</sup> Laurent Debarbieux,<sup>b#</sup> and Alain Bousquet-Mélou<sup>a#</sup>

6 <sup>a</sup> INTHERES, Université de Toulouse, INRAE, ENVT, Toulouse, France

7 <sup>b</sup> Institut Pasteur, Université Paris Cité, CNRS UMR6047, Bacteriophage Bacterium Host,  
8 Paris F-75015 France

9 <sup>c</sup> Université Paris Cité, INSERM U1137, IAME, Paris 75006, France

10 <sup>d</sup> APHP, Hôpital Louis Mourier, DMU ESPRIT, Service de Médecine Intensive Réanimation,  
11 Colombes, France

12

13 **Corresponding authors contact:** laurent.debarbieux@pasteur.fr and alain.bousquet-  
14 melou@envt.fr

15

16 **Abstract**

17 Objectives: Bacteria developing resistance compromise the efficacy of antibiotics or  
18 bacteriophages (phages). We tested the association of these two antibacterials to circumvent  
19 resistance.

20 Methods: With the Hollow Fiber Infection Model (HFIM), we mimicked the concentration  
21 profile of ciprofloxacin in the lungs of patients treated orally for *Pseudomonas aeruginosa*  
22 infections and independently, mimicked a single inhaled administration of phages (one or two  
23 phages).

24 Results: Each treatment selects for antibiotic- or phage-resistant clones in less than 30 h. By  
25 contrast, no bacteria were recovered from the HFIM at 72 h when ciprofloxacin was started 4  
26 h post-phage administration, even when increasing the initial bacterial concentration by a 1000  
27 fold.

28 Conclusion: The combination of phages with antibiotics used according to clinical regimens  
29 prevents the growth of resistant clones, providing opportunities to downscale the use of multiple  
30 antibiotics.

31

32

33 **Keywords:** hollow fiber infection model, antimicrobial resistance, phage therapy,  
34 pharmacokinetics, drug combination

## 35 **Introduction**

36 *Pseudomonas aeruginosa* is an opportunistic pathogen, naturally resistant to many antibiotics.  
37 Moreover, repeated antibiotics treatments administered to patients with chronic airways  
38 infections, such as cystic fibrosis (CF) patients, have led this bacterium to acquire additional  
39 drug-resistance [1,2]. Acute exacerbations are treated by either intravenous (beta-lactams and  
40 aminoglycosides), oral (ciprofloxacin), or inhaled (tobramycin and colistimethate sodium)  
41 administrations of antibiotics [2,3]. The recent TORPEDO-CF study concluded that IV or oral  
42 antibiotics administration could be equivalent [2].

43 In *P. aeruginosa* resistance to fluoroquinolones, such as ciprofloxacin, involves mutations in  
44 *gyrA* or in genes regulating the expression of the MexEF-OprN efflux pump [4,5]. The increase  
45 of the MIC is often modest for the first-step mutants, qualified as “less-susceptible” [5], but is  
46 sufficient to favor their growth within the Mutant Selection Window (MSW) [6]. Next, multiple  
47 mutations lead to a higher MIC, clinical resistance [4], and ultimately require ciprofloxacin to  
48 be associated with other antibiotics, upscaling drug use [7,8]. Interestingly, the gradual increase  
49 of MIC is reproduced *in vitro* by mimicking the clinical regimens of ciprofloxacin, providing a  
50 mean to study the efficacy of combined treatments [9–11].

51 Bacteriophages (phages) are antibacterial viruses. Recently, an increasing number of successful  
52 compassionate treatments in both Europe and the USA have confirmed the therapeutic potential  
53 of phages, which has a long history of human use [12,13]. Phages have the peculiar capacity to  
54 self-amplify at the site of infection, increasing their density locally, at the expense of bacteria  
55 [14]. Nevertheless, as for antibiotics, bacteria have developed several ways to resist to phages  
56 [15]. However, since the molecular mechanisms involved in drug and phage resistance do not  
57 overlap, their association in cocktails or with antibiotics has been proposed to improve the  
58 efficacy of treatments [16,17].

59 By using the Hollow Fiber Infection Model (HFIM, Fig S1, S2) inoculated with *P. aeruginosa*,  
60 we simulated the pharmacokinetics of ciprofloxacin in the human lungs for 72 h and evaluated  
61 the antibacterial efficacy of its combination with phages administered to mimic a single local  
62 inhaled treatment. We show that the combination of phages with a simultaneous or delayed  
63 administration of ciprofloxacin leads to a stronger reduction of *P. aeruginosa* in the HFIM than  
64 individual treatments, preventing the selection of both phage and ciprofloxacin resistant clones.  
65 This reduction reached the limit of detection with the delayed combinations, suggesting that  
66 coupling phages and antibiotics could downscale antibiotics consumption in clinics.

67

## 68 **Material and methods**

### 69 **Bacterial strain**

70 The *Pseudomonas aeruginosa* strain K (PAK) with a MIC of ciprofloxacin of 0.064 µg/mL was  
71 used for all the experiments.

### 72 **Phages and ciprofloxacin**

73 Phage PAK\_P1, a virulent *Myoviridae*, was isolated using strain PAK[18]. Phage LUZ19v is a  
74 variant of phage LUZ19, a virulent *Podoviridae* isolated on strain PAO1 [21], isolated  
75 following serial passages on strain PAK. The efficiency of plating (EOP) of LUZ19 and  
76 LUZ19v on strain PAK is 0.2 and 1, respectively, compared to the EOP on strain PAO1

77 Both phages were amplified in liquid lysogeny broth. Lysates were filtered-sterilized at 0.2µm,  
78 and stored at 4°C until use. Phage titrations (serial dilutions) were spotted on tryptic soy agar  
79 (TSA) supplemented with magnesium sulfate (10 g/L) and activated charcoal (10 g/L) covered  
80 by a lawn of strain PAK made with 10<sup>6</sup> CFU.

81 Stocks of ciprofloxacin (Sigma Aldrich) were stored at -20°C for less than 1 month and thawed  
82 only once.

### 83 **Minimal Inhibitory Concentration (MIC) determination**

84 The MIC of ciprofloxacin for the strain PAK was determined in triplicate by broth microdilution  
85 in cation-adjusted Mueller Hinton broth (MHB), according to the CLSI reference methods.  
86 Frozen samples of bacteria collected at the end (72 h) of each HFIM experiment were thawed  
87 and plated on MH agar overnight. Several colonies were sampled and the bacterial density was  
88 adjusted to  $5 \times 10^5$  CFU/mL before MIC determination.

### 89 **Hollow Fiber Infection Model (HFIM)**

90 The HFIM includes a cartridge (C2011 polysulfone cartridge, FiberCell Systems, Inc.,  
91 Frederick, MD, USA) with capillaries composed of a semipermeable polysulfone membrane.  
92 The pore size of the capillaries (42 kDa) allows equilibration of ciprofloxacin, which can freely  
93 circulate between the intracapillary and extracapillary spaces while the bacteria and the phages  
94 are trapped in the extracapillary space of the cartridge (Fig. S1 and S2).

95 In this study, 20 mL of a suspension containing  $5.5 \log_{10}$  CFU/mL (standard inoculum) or  $8.5$   
96 CFU/mL (high inoculum) of *P. aeruginosa* were inoculated into the extracapillary space of  
97 each cartridge and incubated at 37°C in MHB for 1 h. Ciprofloxacin was added to the central  
98 compartment to obtain the desired maximum concentration ( $C_{\max}$ ) of 1.5 µg/mL and was  
99 continuously diluted with MHB to mimic an elimination half-life of 4 h [19]. A mean inoculum  
100 of  $7.5 \log_{10}$  PFU/mL ( $8.8 \log_{10}$  PFU *in toto*) of either one or two phages with equal amounts of  
101 each phage was added once into the extracapillary space. Treatments with ciprofloxacin or  
102 phages or both simultaneously were started 1 h after the inoculation of bacteria in the HFIM.  
103 When testing the delayed combination, ciprofloxacin was added 4 h after the phages. All the

104 experiments (except the untreated control and single phage combined to ciprofloxacin) were  
105 performed in duplicate.

## 106 **Bacteria and phages quantification**

107 Samples of 1 mL were collected from the extracapillary space to count the bacteria and phages  
108 at 0 (before the addition of phages or ciprofloxacin), 0.25, 0.5, 1, 2, 4, 6, 8, 24, 26, 29, 32, 48,  
109 50, 53, 56, and 72 h. After centrifugation at 3000 g for 10 min, supernatants were recovered to  
110 count phages and pellets were resuspended in 1 mL of NaCl 0.9% to count bacteria. The bacteria  
111 and phage suspensions were serially diluted (10X), and spotted (10  $\mu$ L) in triplicate on either  
112 TSA (to count bacteria) or on TSA covered with strain PAK (to count phages) and incubated  
113 overnight at 37°C. The limit of detection (LOD) was 1.5 log<sub>10</sub> CFU/mL for bacteria and 1.5  
114 log<sub>10</sub> PFU/mL for phages.

## 115 **Monitoring of ciprofloxacin and phage resistance**

116 Twice a day the bacteria sampled from the HFIM were counted on agar plates containing 0.5  
117  $\mu$ g/mL of ciprofloxacin, corresponding to 8-fold the MIC of t strain PAK. The proportion of  
118 less-susceptible bacteria was calculated as the ratio of colonies on drug-supplemented agar  
119 (MIC 8X) divided by colonies on drug-free agar.

120 Bacteria sampled at 72 h were stored in 30% v/v glycerol at -80°C before phage resistance  
121 analysis. Bacteria were thawed and immediately incubated with or without phages (10<sup>8</sup> PFU)  
122 for one hour before plating on agar with or without a single pre-absorbed phage (10<sup>8</sup> PFU/plate).  
123 The successive incubations in broth and on agar were made with the same phage (LUZ19v or  
124 PAK\_P1). The frequency of resistance to each phage was calculated by the ratio of colonies  
125 growing in the presence of phages over those growing in the absence of phages.

126

## 127 **Ciprofloxacin quantification**

128 Ciprofloxacin quantification was performed in samples withdrawn from the central  
129 compartment and from the extracapillary space of the cartridge according to a standard protocol  
130 (Supplementary file).

131

## 132 **Results**

### 133 **Pharmacokinetic analysis of ciprofloxacin in the HFIM**

134 We simulated in the HFIM inoculated with *P. aeruginosa* strain PAK the concentration profile  
135 of ciprofloxacin during 72 h corresponding to the administration of 500 mg twice daily in  
136 patients, using a  $C_{\max}$  at 1.5  $\mu\text{g/mL}$  and a half-life of 4 h (Fig. S1 and methods). The predicted  
137 vs. observed concentrations in the central and peripheral compartments of the HFIM fit well in  
138 all experiments reported thereafter, including those with the combination of ciprofloxacin and  
139 phages (Fig. 1). These data demonstrate the reproducibility of the disposition of ciprofloxacin  
140 in the HFIM and reveal that the presence of phages in the peripheral compartment does not  
141 affect it.

142

### 143 **Clinically-relevant ciprofloxacin regimen selects rapidly for less susceptible** 144 **clones**

145 Following the inoculation of *P. aeruginosa* in the extracapillary space of the HFIM cartridge  
146 (Fig. S1 and S2), the bacterial concentration reached 5.7  $\log_{10}$  CFU/mL within 1 h, time point  
147 at which different treatments were administered. In the absence of treatment, this bacterial  
148 concentration increased to around 9.5  $\log_{10}$  CFU/mL over the first 24 h and remained roughly  
149 stable during the next 48 h (Fig. 2A).

150 Within 30 min after the start of the ciprofloxacin regimen, the density of *P. aeruginosa*  
151 decreased by more than 3-logs and remained below the limit of detection (LOD) between 1 h  
152 and 8 h (Fig. 2A). Subsequently, the bacterial density increased, despite the ciprofloxacin  
153 regimen, reaching at 72 h a similar value ( $9.2 \pm 0.1 \log_{10}$  CFU/mL) compared to the untreated  
154 control.

155 Samples from the HFIM were plated twice a day on agar supplemented with 0.5  $\mu$ g/mL  
156 ciprofloxacin (8-fold MIC) to assess the selection of less-susceptible bacteria. No bacteria from  
157 the initial inocula (n=17) grew on this selective medium. In samples exposed to ciprofloxacin,  
158 the density of less-susceptible bacteria increased over the 72 h to reach 43-100% of the  
159 population (Fig. 2A). The MIC of ciprofloxacin for the bacteria sampled at 72 h increased by  
160 250 fold (16  $\mu$ g/mL; Table 1), showing that within 24 h, the ciprofloxacin regimen administered  
161 in the HFIM selected for less-susceptible bacteria.

162

### 163 **Single or two-phage local administration selects for phage-resistance**

164 We next assessed with the HFIM the susceptibility of *P. aeruginosa* to two phages, the  
165 *Myoviridae* PAK\_P1 and the *Podoviridae* LUZ19v, both positively evaluated previously for  
166 the treatment of acute lung infections in mice [20,21]. The frequency of bacteria among the  
167 naïve population that could grow in the presence of LUZ19v and PAK\_P1 was  $3 \times 10^{-7}$  and  $6 \times 10^{-$   
168  $5$ , respectively (Table 2).

169

170 Phages were administered once in the extracapillary space of the HFIM cartridge containing *P.*  
171 *aeruginosa* to mimic a local administration (Fig. S1). Along these experiments, no phage was  
172 detected in any of the samples taken from the central compartment, confirming that phages  
173 were strictly maintained in the extracapillary space (Fig. S2). The single dose of phages was set



174 to obtain  $7.5 \log_{10}$  PFU/mL in the HFIM ( $8.8 \log_{10}$  PFU *in toto*), which corresponds  
175 approximately to a phage:bacteria ratio of 100 at the time of administration.

176 Following the administration of phage LUZ19v or PAK\_P1, the *P. aeruginosa* density dropped  
177 to  $1.9 \pm 1.3$  or  $2.8 \pm 0.9 \log_{10}$  CFU/mL within 2 h, or 4 h, respectively, and then started to increase  
178 continuously, reaching the density of the untreated control 24 h post-phage administration, and  
179 remained stable for another 48 h (Fig. 2B and 2C). Corresponding to the drop of bacteria, the  
180 density of LUZ19v or PAK\_P1 increased during the first time points and reached a maximum  
181 at 24 h or 48 h, respectively (Fig. S3). The susceptibility to phages of samples taken at 72 h  
182 revealed that bacteria exposed to LUZ19v or PAK\_P1 became nearly all resistant (20 to 50%  
183 and 60 to 100%, respectively), while keeping a large susceptibility to the second phage ( $<10^{-5}$   
184 and  $10^{-7}$ , respectively) (Table 2). Therefore, monophage treatments were as inefficient as  
185 ciprofloxacin to control the growth of resistant bacteria in the HFIM during 72 h.

186 Since phages LUZ19v and PAK\_P1 recognize two different bacterial receptors, the type IV  
187 pilus [22] and the lipopolysaccharide (LPS, [18]), respectively, we assessed if their combination  
188 could lower the selection of resistant clones. The two-phage cocktail led to a similar reduction  
189 of the bacterial density during the first time points compared to phage LUZ19v alone (Fig. 2D).  
190 Then, the slope of the bacterial growth between 8 and 24 h was less steep compared to  
191 monophage treatments. Bacterial counts reached similar levels to the untreated control at 48 h  
192 and in the 72 h samples. The proportion of bacteria resistant to either phages was about one  
193 order of magnitude lower compared to single treatments (Table 2). Therefore, the use of two  
194 phages instead of one delays the selection of phage-resistant bacteria but does not prevent it.

195 The MIC of bacteria at 72 h following exposure to one or two phages was similar to the MIC  
196 of the inoculated strain showing that the exposure to phages does not select for less susceptible  
197 clones to ciprofloxacin (Table 1). Reciprocally, the bacteria from the HFIM exposed to  
198 ciprofloxacin were as susceptible to either phages as the control (Table 2).

199

200 **The combination of phages with ciprofloxacin prevents the growth resistant**  
201 **bacteria**

202 To assess the impact of the combination of phages with ciprofloxacin, we tested two modalities  
203 corresponding to a simultaneous or a delayed treatment (phages first and ciprofloxacin 4 h  
204 later). The simultaneous treatment led to a rapid killing of bacteria, since their density dropped  
205 below the LOD in 15 min (Fig. 3A). Impressively, we could not detect any colony on samples  
206 taken during the next 72 h. During these experiments (n=2), the density of phages was stable,  
207 suggesting that they did not amplify (Fig. S4). When adding ciprofloxacin 4 h after the two-  
208 phage cocktail, the density of phages slightly increased and then remained stable up to 72 h.  
209 Here, again, the combination rapidly killed the population of *P. aeruginosa*, and no viable  
210 bacteria were recovered at any time after 1 h (Fig. 3B). Similar results were obtained when  
211 either phage was simultaneously added with ciprofloxacin (Fig. S5).

212

213 **The antibacterial efficacy of the combination of phages with ciprofloxacin is**  
214 **density dependent**

215 To assess the robustness of the combined treatment, the HFIM was inoculated with a 1000- fold  
216 higher bacterial inoculum while the regimen of either ciprofloxacin and phages remained  
217 unchanged. Following such inoculation, the bacterial density reached  $8.6 \pm 0.3 \log_{10}$  CFU/mL  
218 within 1 h, which corresponds to a phage:bacteria ratio of 0.1. The simultaneous addition of  
219 phages and ciprofloxacin rapidly killed bacteria with a density falling below the LOD between  
220 30 min and 8 h (Fig. 3C). Subsequently, the bacterial density increased reaching  $8.6 \pm 0.06 \log_{10}$   
221 CFU/mL at 72 h. The bacteria recovered had a reduced susceptibility to ciprofloxacin (16 to  
222 32-fold higher MIC) and to phages compared to the naïve population (Tables 1 and 2). In the

223 two independent assays, the proportion of bacteria resistant to each phage increased with  
224 bacteria becoming fully resistant to LUZ19v and partially resistant to PAK\_P1 in one replicate  
225 and the other way around in the second.

226 By contrast, when adding ciprofloxacin 4 h after the two-phage cocktail, the initial reduction of  
227 bacteria was slower compared to the simultaneous administration with bacterial density falling  
228 below the LOD at 1 h for one replicate and 6 h for the other (Fig. 3D). However, after this  
229 decline, no increase of the bacterial density was observed and again no colony could be  
230 recovered on samples taken during the next 72 h. We concluded that when phages reduce first  
231 the size of the bacterial population, the remaining population was not large enough to include  
232 less-susceptible mutants to ciprofloxacin.

## 233 Discussion

234 *P. aeruginosa* lung infections are increasingly difficult to treat with antibiotics calling for  
235 therapeutic strategies to enhance bacterial killing. In this study, we developed an innovative use  
236 of the HFIM to evaluate the potential benefit of combining ciprofloxacin with phages. The  
237 HFIM allows the simulation of a clinically relevant ciprofloxacin concentration profile obtained  
238 with oral treatment that leads in monotherapy to the selection of clones with increasing  
239 resistance as previously reported [9–11]. The combination of ciprofloxacin and meropenem in  
240 the HFIM suppressed the growth of resistant *P. aeruginosa* isolates, including hypermutable  
241 strains [10,11]. In clinics, this combination requires IV administration and the hospitalization  
242 of patients [2]. Moreover, it participates to the upscaling of drugs use and overall increases the  
243 selection of MDR strains.

244 Instead of a second antibiotic, we evaluated the combination of ciprofloxacin with phages. A  
245 unique local administration of one or two phages could not prevent the growth of phage-  
246 resistant bacteria, as generally observed with *in vitro* tests. We observed that the growth of  
247 resistant clones in presence of the two phages was delayed compared to single phages, in  
248 agreement with increased fitness cost, as reported elsewhere [23,24].

249 In contrast to previous studies that combined a single addition of ciprofloxacin, with either  
250 phage OKMO1, or PEV31, or a five-phages cocktail, we did not observe a modification of the  
251 MIC for ciprofloxacin in any of the phage-resistant clones tested [17,25,26]. This suggests that  
252 these clones may not be selected when a clinically relevant regimen of ciprofloxacin is used.  
253 Moreover, the ciprofloxacin resistant clones remained largely susceptible to each of the two  
254 phages as their frequency was the same as in the control (without treatment). Altogether, the  
255 lack of correlation between the profiles of susceptibility and resistance to ciprofloxacin and the  
256 two phages demonstrates their independent antibacterial activity.

257 The combination of ciprofloxacin with one or two phages administered simultaneously on the  
258 HFIM inoculated with the same bacterial density than individual treatments abolished the  
259 growth of resistant clones during at least 72 h, a long-term performance compared to less than  
260 30 h for the latter treatments. This strongly suggests that in these conditions no bacteria survived.  
261 However, when the initial bacterial density was 1000 fold higher the growth of resistant clones  
262 was detected at 24 h and rise up during the next 48 h, showing that this regimen was unable to  
263 control a dense population of *P. aeruginosa*. When phages are administered first and the  
264 ciprofloxacin 4 h later, the drop of bacteria aligned with the increase of phage concentrations.  
265 The bacterial density reached the LOD until the end of each experiment, with low or high  
266 inoculum, suggesting that no bacteria survived these regimens.

267 The *in vivo* efficacy of the combination of ciprofloxacin (a single oral dose simulating 750 mg  
268 in human) with phages (a single intravenous administration of  $10^{10}$  PFU) was previously tested  
269 in an experimental *P. aeruginosa* endocarditis in rats and led to more frequent negative  
270 vegetation cultures after 6 h than in rats receiving only phages or only ciprofloxacin [27]. Using  
271 a murine model of *P. aeruginosa* pulmonary infection, a unique dry power insufflation of  
272 ciprofloxacin and phages led to a reduction of nearly 6 log<sub>10</sub> CFU in 24 h [28]. In these two  
273 studies, a unique dose of ciprofloxacin was used associated to short time end-points. The data  
274 we obtained with the HFIM suggest that the administration of antibiotics following their  
275 recommended regimens could increase the efficacy of these combinations on longer time  
276 points.

277 One of the limitations of our study relates to the lack of an immune component that could  
278 enhance the overall efficacy of such regimen as the immune system was previously shown to  
279 cooperate with phages during experimental pulmonary phage therapy [29]. Another limitation  
280 is the lack of loss of phages over time as they remained trapped in the same compartment of  
281 bacteria. However, the decay of phages in uninfected or infected lungs of mice was shown to

282 be rather weak (below 1-log per day) compared to the overall density of phages in the HFIM  
283 [30]. The data presented here advocate in favor of a translation to clinics that could ultimately  
284 slow down the use of multiple antibiotics and therefore, the selection of MDR strains [17].

285

## 286 **Acknowledgements**

287 We thank Dwayne Roach for the *in vitro* adaptation of LUZ19v to strain PAK, and Thierry  
288 Pédrón for the preparation of phage lysates.

289 This project was supported by a grant from Institut Carnot France Futur Elevage and Institut  
290 Carnot Pasteur Maladies Infectieuses to AB and LD, respectively.

291

292

## 293 References

- 294 [1] Livermore DM. Multiple Mechanisms of Antimicrobial Resistance in *Pseudomonas*  
295 *aeruginosa*: Our Worst Nightmare? *Clinical Infectious Diseases* 2002;34:634–40.  
296 <https://doi.org/10.1086/338782>.
- 297 [2] Hewer SCL, Smyth AR, Brown M, Jones AP, Hickey H, Kenna D, et al. Intravenous  
298 versus oral antibiotics for eradication of *Pseudomonas aeruginosa* in cystic fibrosis  
299 (TORPEDO-CF): a randomised controlled trial. *Lancet Respir Med* 2020;8:975–86.  
300 [https://doi.org/10.1016/S2213-2600\(20\)30331-3](https://doi.org/10.1016/S2213-2600(20)30331-3).
- 301 [3] Castellani C, Duff AJA, Bell SC, Heijerman HGM, Munck A, Ratjen F, et al. ECFS best  
302 practice guidelines: the 2018 revision. *J Cyst Fibros* 2018;17:153–78.  
303 <https://doi.org/10.1016/j.jcf.2018.02.006>.
- 304 [4] Llanes C, Köhler T, Patry I, Dehecq B, van Delden C, Plésiat P. Role of the MexEF-  
305 OprN efflux system in low-level resistance of *Pseudomonas aeruginosa* to ciprofloxacin.  
306 *Antimicrob Agents Chemother* 2011;55:5676–84. [https://doi.org/10.1128/AAC.00101-](https://doi.org/10.1128/AAC.00101-11)  
307 11.
- 308 [5] Jalal S, Ciofu O, Hoiby N, Gotoh N, Wretling B. Molecular mechanisms of  
309 fluoroquinolone resistance in *Pseudomonas aeruginosa* isolates from cystic fibrosis  
310 patients. *Antimicrob Agents Chemother* 2000;44:710–2.  
311 <https://doi.org/10.1128/aac.44.3.710-712.2000>.
- 312 [6] Zhao X, Drlica K. Restricting the selection of antibiotic-resistant mutants: a general  
313 strategy derived from fluoroquinolone studies. *Clin Infect Dis* 2001;33 Suppl 3:S147-  
314 156. <https://doi.org/10.1086/321841>.
- 315 [7] Talapko J, Škrlec I. The Principles, Mechanisms, and Benefits of Unconventional  
316 Agents in the Treatment of Biofilm Infection. *Pharmaceuticals (Basel)* 2020;13.  
317 <https://doi.org/10.3390/ph13100299>.
- 318 [8] Czaplewski L, Bax R, Clokie M, Dawson M, Fairhead H, Fischetti VA, et al.  
319 Alternatives to antibiotics—a pipeline portfolio review. *Lancet Infect Dis* 2016;16:239–  
320 51. [https://doi.org/10.1016/S1473-3099\(15\)00466-1](https://doi.org/10.1016/S1473-3099(15)00466-1).
- 321 [9] Marchbanks CR, McKiel JR, Gilbert DH, Robillard NJ, Painter B, Zinner SH, et al.  
322 Dose ranging and fractionation of intravenous ciprofloxacin against *Pseudomonas*  
323 *aeruginosa* and *Staphylococcus aureus* in an in vitro model of infection. *Antimicrob*  
324 *Agents Chemother* 1993;37:1756–63. <https://doi.org/10.1128/aac.37.9.1756>.
- 325 [10] Agyeman AA, Rogers KE, Tait JR, Bergen PJ, Kirkpatrick CM, Wallis SC, et al.  
326 Evaluation of Meropenem-Ciprofloxacin Combination Dosage Regimens for the  
327 Pharmacokinetics of Critically Ill Patients With Augmented Renal Clearance. *Clin*  
328 *Pharmacol Ther* 2021;109:1104–15. <https://doi.org/10.1002/cpt.2191>.
- 329 [11] Rees VE, Yadav R, Rogers KE, Bulitta JB, Wirth V, Oliver A, et al. Meropenem  
330 Combined with Ciprofloxacin Combats Hypermutable *Pseudomonas aeruginosa* from  
331 Respiratory Infections of Cystic Fibrosis Patients. *Antimicrob Agents Chemother*  
332 2018;62. <https://doi.org/10.1128/AAC.01150-18>.
- 333 [12] Chanishvili N. Bacteriophages as Therapeutic and Prophylactic Means: Summary of the  
334 Soviet and Post Soviet Experiences. *Curr Drug Deliv* 2016;13:309–23.  
335 <https://doi.org/10.2174/156720181303160520193946>.
- 336 [13] Aslam S, Lampley E, Wooten D, Karris M, Benson C, Strathdee S, et al. Lessons  
337 Learned From the First 10 Consecutive Cases of Intravenous Bacteriophage Therapy to  
338 Treat Multidrug-Resistant Bacterial Infections at a Single Center in the United States.  
339 *Open Forum Infect Dis* 2020;7:ofaa389. <https://doi.org/10.1093/ofid/ofaa389>.

- 340 [14] Roach DR, Debarbieux L. Phage therapy: awakening a sleeping giant. *Emerg Top Life*  
341 *Sci* 2017;1:93–103. <https://doi.org/10.1042/ETLS20170002>.
- 342 [15] Bernheim A, Sorek R. The pan-immune system of bacteria: antiviral defence as a  
343 community resource. *Nat Rev Microbiol* 2020;18:113–9.  
344 <https://doi.org/10.1038/s41579-019-0278-2>.
- 345 [16] Chang RYK, Das T, Manos J, Kutter E, Morales S, Chan H-K. Bacteriophage PEV20  
346 and Ciprofloxacin Combination Treatment Enhances Removal of *Pseudomonas*  
347 *aeruginosa* Biofilm Isolated from Cystic Fibrosis and Wound Patients. *AAPS J*  
348 2019;21:49. <https://doi.org/10.1208/s12248-019-0315-0>.
- 349 [17] Chan BK, Sistro M, Wertz JE, Kortright KE, Narayan D, Turner PE. Phage selection  
350 restores antibiotic sensitivity in MDR *Pseudomonas aeruginosa*. *Sci Rep* 2016;6:26717.  
351 <https://doi.org/10.1038/srep26717>.
- 352 [18] Henry M, Bobay L-M, Chevallereau A, Saussereau E, Ceysens P-J, Debarbieux L. The  
353 search for therapeutic bacteriophages uncovers one new subfamily and two new genera  
354 of *Pseudomonas*-infecting Myoviridae. *PLoS ONE* 2015;10:e0117163.  
355 <https://doi.org/10.1371/journal.pone.0117163>.
- 356 [19] Begg EJ, Robson RA, Saunders DA, Graham GG, Buttimore RC, Neill AM, et al. The  
357 pharmacokinetics of oral fleroxacin and ciprofloxacin in plasma and sputum during  
358 acute and chronic dosing. *Br J Clin Pharmacol* 2000;49:32–8.  
359 <https://doi.org/10.1046/j.1365-2125.2000.00105.x>.
- 360 [20] Debarbieux L, Leduc D, Maura D, Morello E, Criscuolo A, Grossi O, et al.  
361 Bacteriophages can treat and prevent *Pseudomonas aeruginosa* lung infections. *J Infect*  
362 *Dis* 2010;201:1096–104. <https://doi.org/10.1086/651135>.
- 363 [21] Henry M, Lavigne R, Debarbieux L. Predicting in vivo efficacy of therapeutic  
364 bacteriophages used to treat pulmonary infections. *Antimicrob Agents Chemother*  
365 2013;57:5961–8. <https://doi.org/10.1128/AAC.01596-13>.
- 366 [22] Chibeu A, Ceysens P-J, Hertveldt K, Volckaert G, Cornelis P, Matthijs S, et al. The  
367 adsorption of *Pseudomonas aeruginosa* bacteriophage  $\phi$ KMV is dependent on  
368 expression regulation of type IV pili genes. *FEMS Microbiology Letters* 2009;296:210–  
369 8. <https://doi.org/10.1111/j.1574-6968.2009.01640.x>.
- 370 [23] Wright RCT, Friman V-P, Smith MCM, Brockhurst MA. Cross-resistance is modular in  
371 bacteria-phage interactions. *PLoS Biol* 2018;16:e2006057.  
372 <https://doi.org/10.1371/journal.pbio.2006057>.
- 373 [24] Wright RCT, Friman V-P, Smith MCM, Brockhurst MA. Resistance Evolution against  
374 Phage Combinations Depends on the Timing and Order of Exposure. *MBio* 2019;10.  
375 <https://doi.org/10.1128/mBio.01652-19>.
- 376 [25] Chow MYT, Chang RYK, Li M, Wang Y, Lin Y, Morales S, et al. Pharmacokinetics and  
377 Time-Kill Study of Inhaled Antipseudomonal Bacteriophage Therapy in Mice.  
378 *Antimicrob Agents Chemother* 2020;65. <https://doi.org/10.1128/AAC.01470-20>.
- 379 [26] Engeman E, Freyberger HR, Corey BW, Ward AM, He Y, Nikolich MP, et al.  
380 Synergistic Killing and Re-Sensitization of *Pseudomonas aeruginosa* to Antibiotics by  
381 Phage-Antibiotic Combination Treatment. *Pharmaceuticals* 2021;14:184.  
382 <https://doi.org/10.3390/ph14030184>.
- 383 [27] Oechslin F, Piccardi P, Mancini S, Gabard J, Moreillon P, Entenza JM, et al. Synergistic  
384 Interaction Between Phage Therapy and Antibiotics Clears *Pseudomonas Aeruginosa*  
385 Infection in Endocarditis and Reduces Virulence. *J Infect Dis* 2017;215:703–12.  
386 <https://doi.org/10.1093/infdis/jiw632>.
- 387 [28] Lin Y, Quan D, Chang RYK, Chow MYT, Wang Y, Li M, et al. Synergistic activity of  
388 phage PEV20-ciprofloxacin combination powder formulation—A proof-of-principle study



- 389 in a *P. aeruginosa* lung infection model. *Eur J Pharm Biopharm* 2021;158:166–71.  
390 <https://doi.org/10.1016/j.ejpb.2020.11.019>.
- 391 [29] Roach DR, Leung CY, Henry M, Morello E, Singh D, Di Santo JP, et al. Synergy  
392 between the Host Immune System and Bacteriophage Is Essential for Successful Phage  
393 Therapy against an Acute Respiratory Pathogen. *Cell Host Microbe* 2017;22:38-47.e4.  
394 <https://doi.org/10.1016/j.chom.2017.06.018>.
- 395 [30] Delattre R, Seurat J, Haddad F, Nguyen T-T, Gaborieau B, Kane R, et al. Combination  
396 of in vivo phage therapy data with in silico model highlights key parameters for  
397 pneumonia treatment efficacy. *Cell Reports* 2022;39:110825.  
398 <https://doi.org/10.1016/j.celrep.2022.110825>.  
399

400

401 **Table 1.** MIC of ciprofloxacin of the parental strain PAK and clones from samples exposed to  
402 either ciprofloxacin, or phages, or their combination in the HFIM during 72 h.

| <b>Experimental conditions</b>                             | <b>MIC (<math>\mu\text{g}/\text{mL}</math>)</b> |
|------------------------------------------------------------|-------------------------------------------------|
| Inoculum ( $5.7 \log_{10}$ CFU/mL)                         | 0.064                                           |
| <b>HFIM (72 h samples)</b>                                 |                                                 |
| Control (n=1)                                              | 0.064                                           |
| Ciprofloxacin (n=2)                                        | 16; 16                                          |
| LUZ19v (n=2)                                               | 0.128; 0.128                                    |
| PAK_P1 (n=2)                                               | 0.064; 0.064                                    |
| LUZ19v and PAK_P1 (n=2)                                    | 0.064:0.064                                     |
| Simultaneous combination of ciprofloxacin and phages (n=2) | NBR                                             |
| Delayed combination of ciprofloxacin and phages (n=2)      | NBR                                             |
| Simultaneous combination of ciprofloxacin and phages (n=2) | 1; 2                                            |
| Delayed combination of ciprofloxacin and phages (n=2)      | NBR                                             |

403 Grey lines correspond to experiments performed with an inoculum of  $8 \log_{10}$  CFU/mL

404 NBR, no bacteria recovered

405

406 **Table 2.** Frequencies of phage resistant clones from samples exposed to either ciprofloxacin,  
 407 or phages, or their combination in the HFIM during 72 h

| <b>Experimental conditions</b>                             | Resistance to LUZ19v                     | Resistance to PAK_P1                    |
|------------------------------------------------------------|------------------------------------------|-----------------------------------------|
| Inoculum (5.7 log <sub>10</sub> CFU/mL)                    | 1.10 <sup>-7</sup>                       | 6.10 <sup>-5</sup>                      |
| <b>HFIM (72 h samples)</b>                                 |                                          |                                         |
| Control (n=1)                                              | 8.10 <sup>-5</sup>                       | <LOD <sup>b</sup>                       |
| Ciprofloxacin (n=2)                                        | 1.10 <sup>-5</sup> ; 1.10 <sup>-5</sup>  | 6.10 <sup>-6</sup> ; 3.10 <sup>-6</sup> |
| LUZ19v (n=2)                                               | 5.10 <sup>-1</sup> ; 2. 10 <sup>-1</sup> | 8.10 <sup>-5</sup> ; 1.10 <sup>-7</sup> |
| PAK_P1 (n=2)                                               | 3.10 <sup>-7</sup> ; <10 <sup>-9</sup>   | 1; 6.10 <sup>-1</sup>                   |
| LUZ19v and PAK_P1 (n=2)                                    | 1.10 <sup>-2</sup> ; 6.10 <sup>-3</sup>  | 2.10 <sup>-1</sup> ; 8.10 <sup>-3</sup> |
| Simultaneous combination of ciprofloxacin and phages (n=2) | NBR <sup>a</sup>                         | NBR                                     |
| Delayed combination of ciprofloxacin and phages (n=2)      | NBR                                      | NBR                                     |
| Simultaneous combination of ciprofloxacin and phages (n=2) | 1; <LOD <sup>b</sup>                     | <LOD <sup>b</sup> ; 1                   |
| Delayed combination of ciprofloxacin and phages (n=2)      | NBR                                      | NBR                                     |

408 Grey lines correspond to experiments performed with an inoculum of 8 log<sub>10</sub> CFU/mL

409 <sup>a</sup>, no bacteria recovered

410 <sup>b</sup>, limit of detection

411

412

413 Figure 1

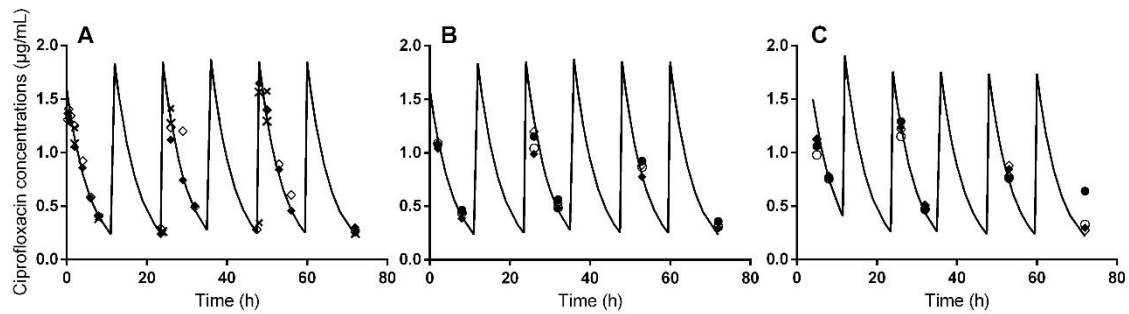

414

415 **Figure 1. The regimen of ciprofloxacin administered in the HFIM reproduces the regimen**  
416 **of oral treatments.**

417 Expected (black line) and observed (diamonds and circles for standard and high inoculum,  
418 respectively) concentration-time profiles of ciprofloxacin in the HFIM (inoculated with *P.*  
419 *aeruginosa* strain PAK) after its administration twice a day for the following experiments: A,  
420 ciprofloxacin alone. B, ciprofloxacin administered simultaneously with the two-phase cocktail.  
421 C, ciprofloxacin administered 4 h post two-phase cocktail. n=2 for each inoculum represented  
422 by open and filled symbols. The concentrations in the peripheral compartment are represented  
423 with crosses in panel A.

424

425

426 Figure 2

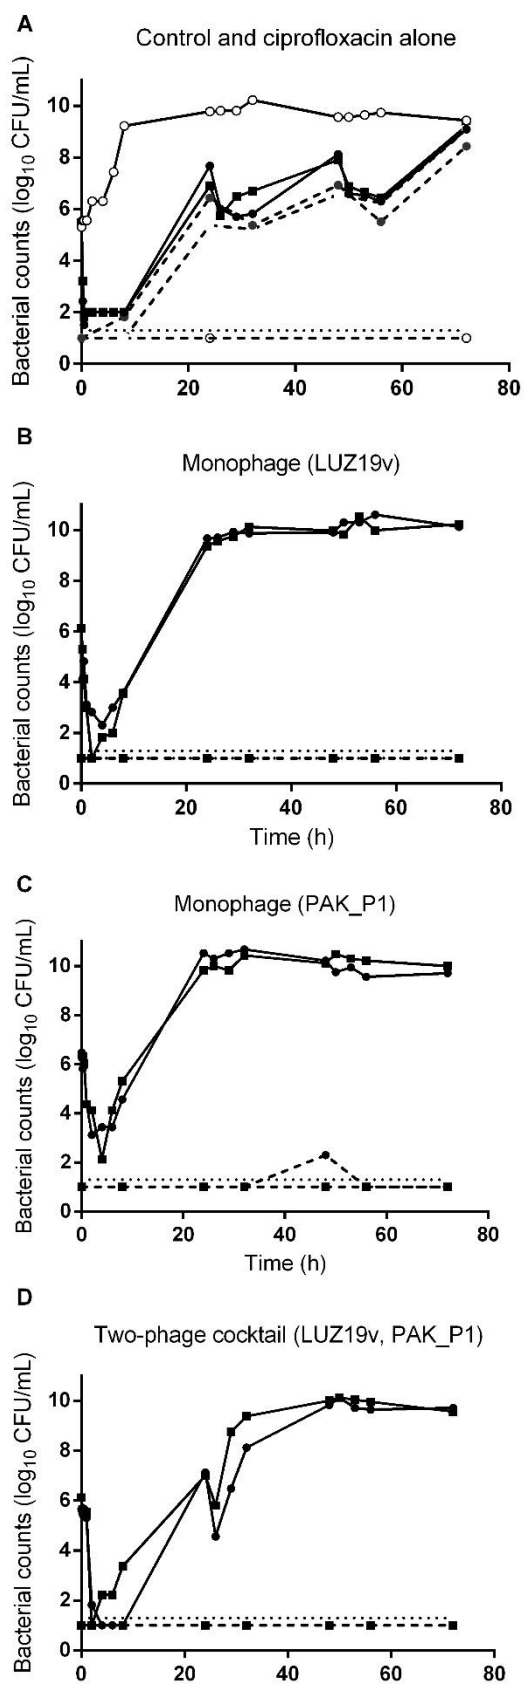

427

428 **Figure 2. The growth of *P. aeruginosa* in the HFIM is not controlled by phages or**  
429 **ciprofloxacin**

430 The concentration of *P. aeruginosa* strain PAK ( $\log_{10}$  CFU/mL) in the HFIM from 1 h post-  
431 inoculation to 72 h after exposure to ciprofloxacin or phages. A, control experiment (n=1) and  
432 ciprofloxacin alone (n=2). B, monophage (LUZ19v) (n=2). C, monophage (PAK\_P1) (n=2). D,  
433 two-phage cocktail (LUZ19v, PAK\_P1) (n=2). Solid lines represent total bacterial populations  
434 and dashed lines represent less-susceptible bacteria growing on agar containing 0.5  $\mu\text{g/mL}$  of  
435 ciprofloxacin. Square and circles represent independent experiments. The horizontal dotted line  
436 corresponds to the LOD.

437

438

439 **Figure 3**

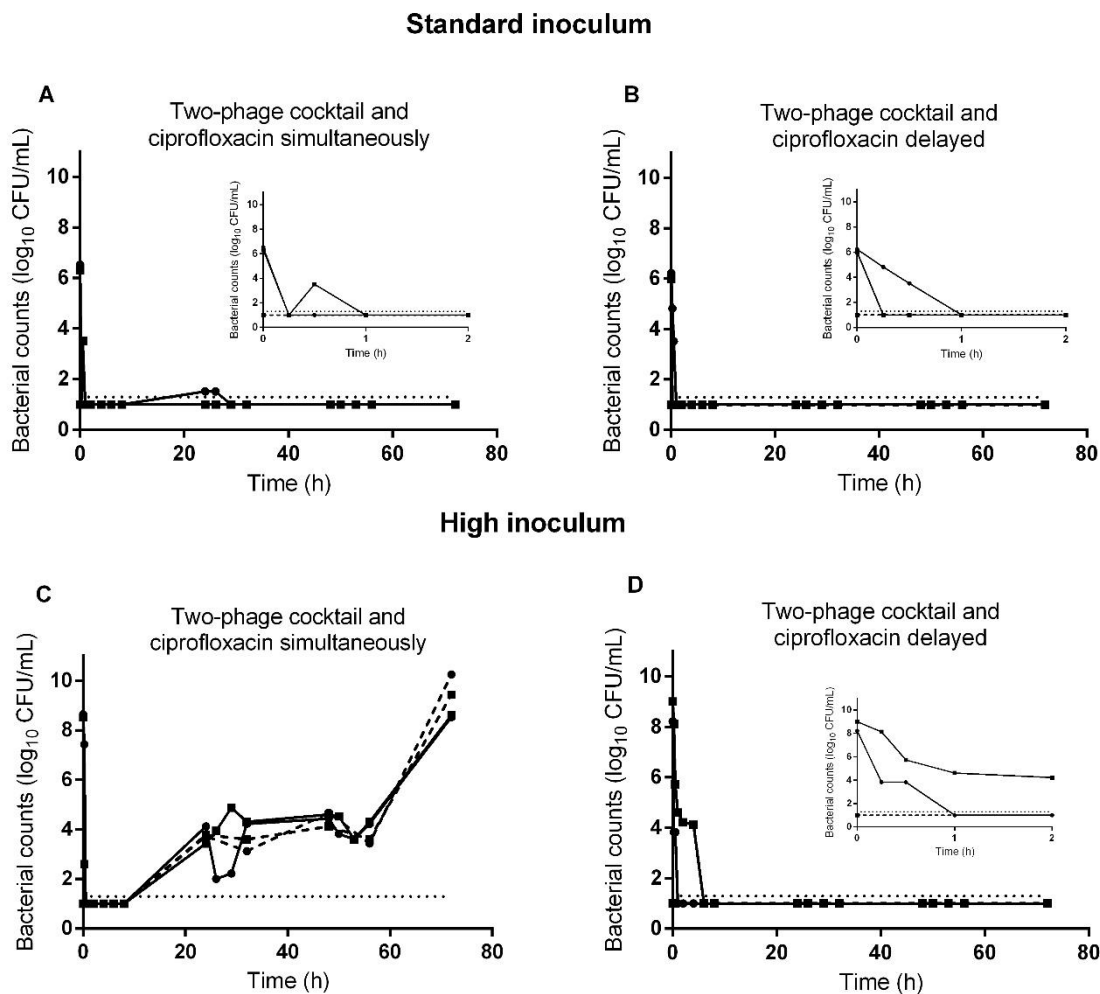

440

441 **Figure 3. The growth of *P. aeruginosa* in the HFIM is only controlled by the**  
442 **combination of phages and ciprofloxacin**

443 Population of bacteria (mean±SD in log<sub>10</sub> CFU/mL) in the HFIM over 72 h post exposure of a  
444 standard (A and B) or high inoculum (C and D) of *P. aeruginosa* to the combination of  
445 ciprofloxacin and phages. A and C, combination of simultaneous administrations of  
446 ciprofloxacin with the two-phase cocktail (n=2). B and D, combination of the two-phase  
447 cocktail with ciprofloxacin administrated 4 h post-phages (n=2). Solid lines represent total  
448 bacterial populations and dashed lines represent less-susceptible bacteria growing on agar  
449 containing 0.5 µg/mL of ciprofloxacin. Square and circles represent independent experiments.  
450 The horizontal dotted line corresponds to the LOD.

451 **Supplementary figures**

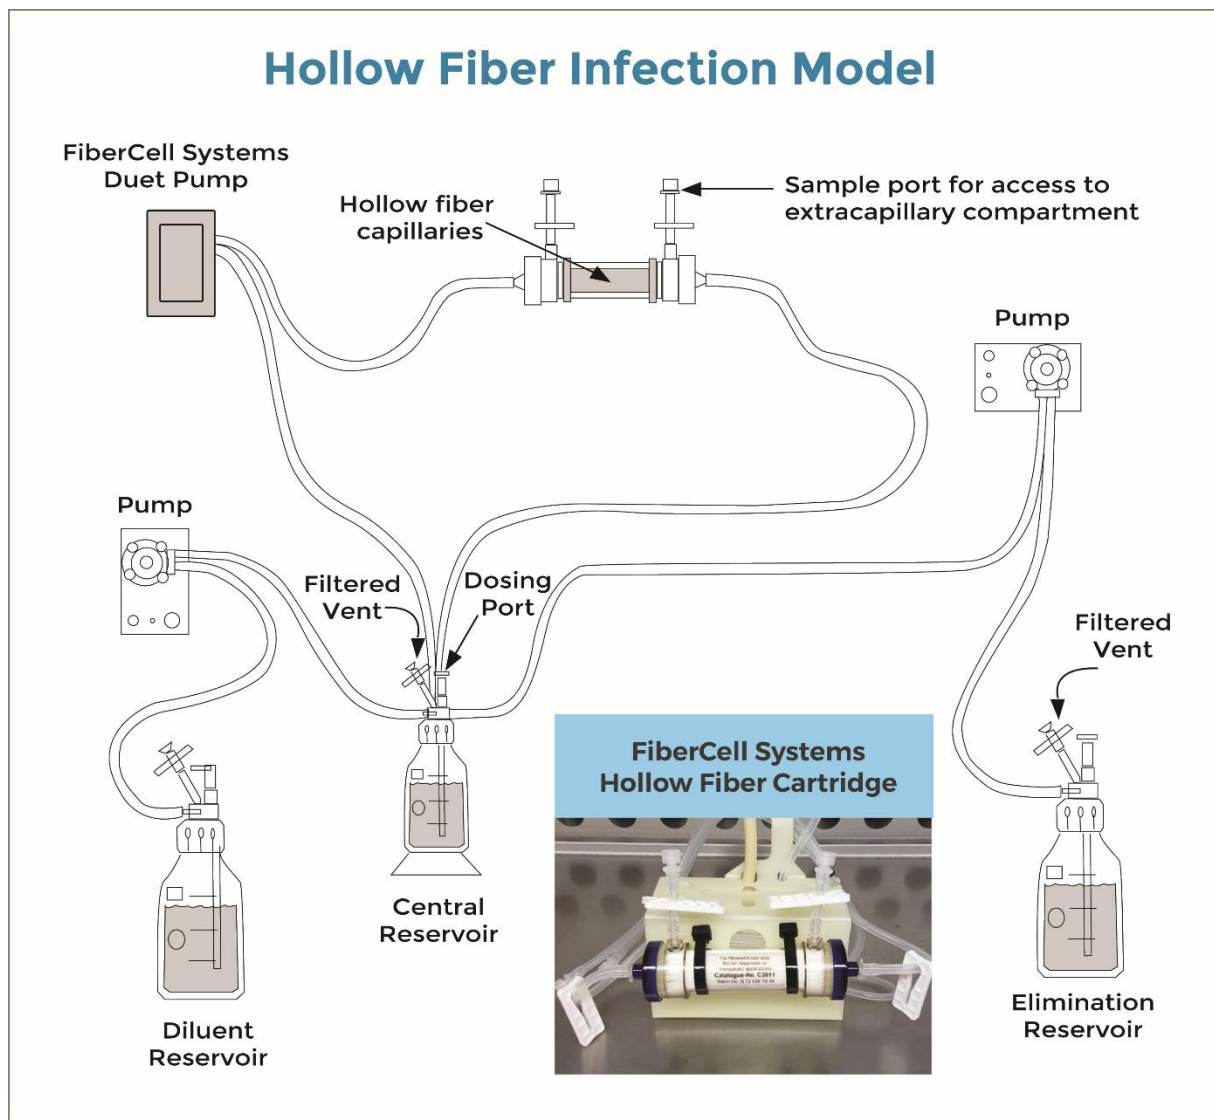

452  
453 **Figure S1.** Schematic representation of the Hollow Fiber Infection Model kindly provided by  
454 FiberCell Systems®. Bacteria and phages were trapped in the extracapillary space of the  
455 cartridge (peripheral compartment) (see also embedded photo). Ciprofloxacin was added to the  
456 central reservoir and freely circulated through the cartridge and bacteria by means of the  
457 FiberCell Systems Duet pump® (FiberCell Systems, Inc., Frederick, MD, USA). Ciprofloxacin  
458 concentrations decreased over time after drug administrations, due to the continuous addition  
459 of a diluent (MHB) by means of another set of pumps



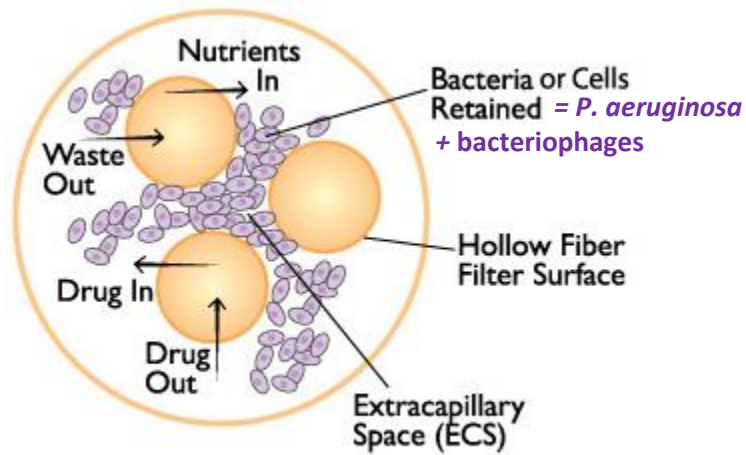

460

461 **Figure S2.** Schematic representation of the cross-section of the cartridge of the HFIM, kindly  
462 provided by FiberCell Systems®. Phages were directly introduced in the extracapillary space  
463 containing *P. aeruginosa* to simulate local administration. Both phages and *P. aeruginosa*  
464 remained trapped in this extracapillary space during the experiments. The drug, here  
465 ciprofloxacin, freely circulates through the fibers and was distributed both in the central  
466 reservoir and the extracapillary spaces of the cartridge.

467 Figure S3

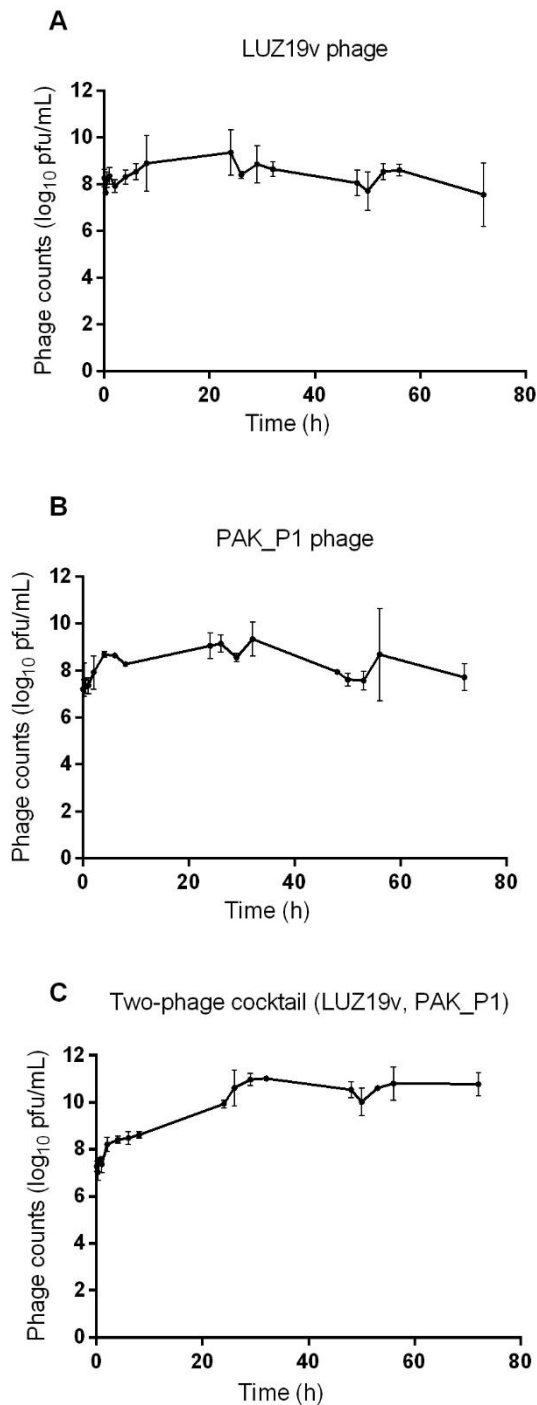

468

469 **Figure S3.** Total population of phages (mean  $\pm$  SD in log<sub>10</sub> PFU/mL) in the HFIM over 72 h in  
470 the different experiments. A, phage LUZ19v alone (n=2). B, phage PAK\_P1 alone (n=2). C,  
471 phages LUZ19v and PAK\_P1 (n=2).

472

473 **Figure S4**

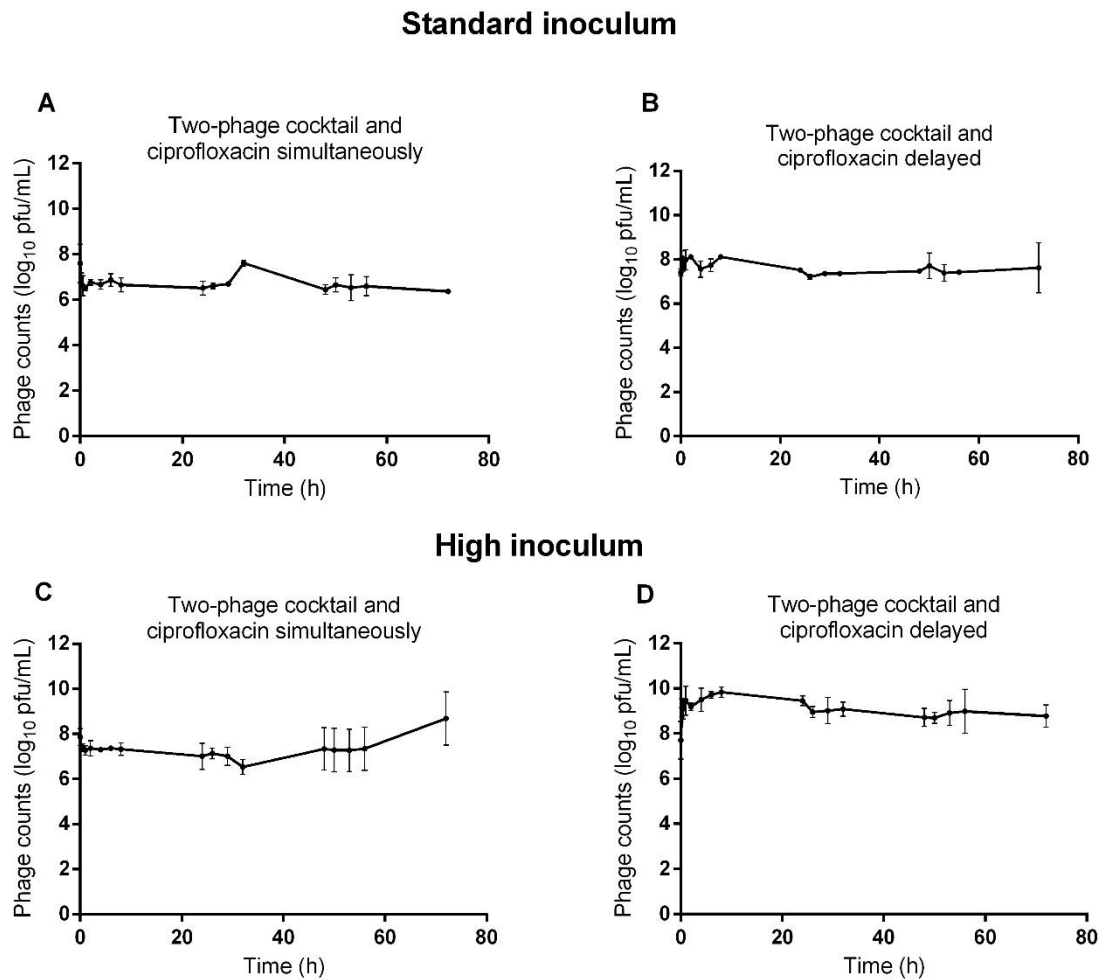

474

475 **Figure S4.** Total population of phages (mean±SD in log<sub>10</sub> PFU/mL) in the HFIM over 72 h in  
476 the experiments with a standard (A and B) or high inoculum (C and D) of *P. aeruginosa*. A  
477 and C, combination of simultaneous administrations of ciprofloxacin with the two-phage  
478 cocktail (n=2). B and D, combination of the two-phage cocktail with ciprofloxacin  
479 administrated 4 h post-phages (n=2).

480

481

482 Figure S5

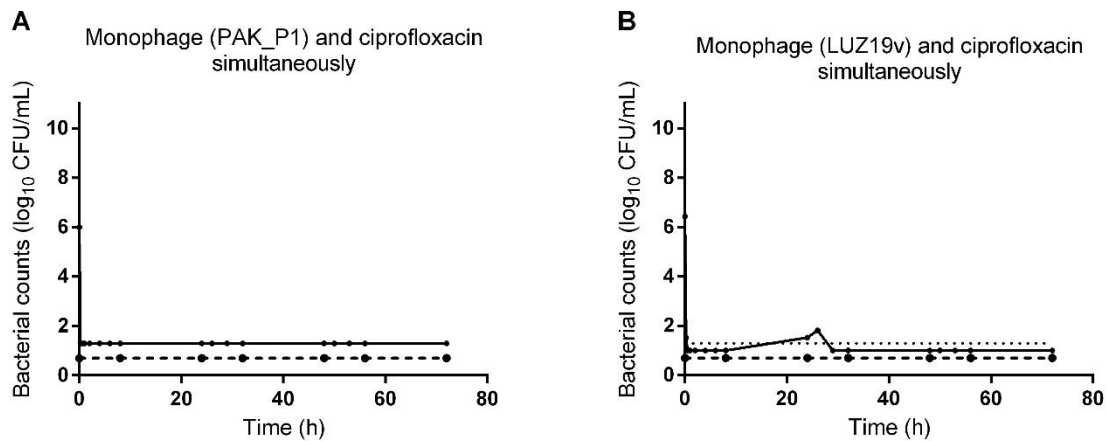

483

484 **Figure S5.** Population of bacteria (mean±SD in log<sub>10</sub> CFU/mL) in the HFIM over 72 h after  
485 exposure to the combination of ciprofloxacin and a single phage. A, combination of  
486 simultaneous administration of ciprofloxacin with LUZ19v (n=1). B, combination of  
487 simultaneous administration of ciprofloxacin with PAK\_P1 (n=1). Solid lines represent total  
488 bacterial populations and dashed lines represent less-susceptible bacteria growing on agar  
489 containing 0.5 µg/mL of ciprofloxacin. The horizontal dotted line corresponds to the LOD.

490

491 **Supplementary file**

492

493 Samples for ciprofloxacin quantification were withdrawn from the central compartment at 0.25,  
494 0.5, 1, 2, 4, 6, 8, 24, 26, 29, 32, 48, 50, 53, 56, and 72 h, and from the extracapillary space of  
495 the cartridge at 2, 8, 24, 26, 48, 54, and 72 h (Supplementary file). Samples were centrifuged at  
496 3000 g for 10 min, and the supernatant was stored at -20°C. One hundred microliters of water  
497 containing the marbofloxacin internal standard at 5 µg/mL were added to 100 µL of calibrators,  
498 quality controls, or samples. The mixture was vortexed at 1400 rpm for 2 min at 10°C and  
499 centrifuged at 20000 g for 10 min. The supernatant (20 µL) was injected into an Acquity ultra  
500 performance liquid chromatography (UPLC®) coupled to a UV detector (Waters, Milford, MA,  
501 USA). Ciprofloxacin was eluted at 0.3 mL/min on an Acquity UPLC BEH C18 column (2.1x50  
502 mm, 1.7 µm) equipped with a frit (0.2 µm, 2.1 mm) and set at 40°C under the following gradient  
503 conditions: t<sub>0</sub> 90% A (H<sub>2</sub>O acidified with 0.1% HCOOH) 10% B (acetonitrile); t(4 min) 60%  
504 A and 40% B. The return to initial conditions was held for 1 min. Wavelength detection was  
505 set at 278 nm. Chromatographic data were monitored by Empower software (Waters, Milford,  
506 MA, USA). The method was validated from 0.05 to 5 µg/mL of ciprofloxacin with a linear  
507 model weighted by 1/X<sup>2</sup> (X=concentration). Precisions and accuracy were checked by injecting  
508 six replicates of QC samples over three days, at the limit of quantification (0.05 µg/mL); 0.075  
509 µg/mL; 0.75 µg/mL, and 4 µg/mL. Accuracies ranged from 92% to 107%, with intra-day and  
510 inter-day CV precisions below 5% and 13%, respectively. The limit of quantification was  
511 validated at 0.05 µg/mL, with an accuracy of 96% and intra- and inter-day CV precision lower  
512 than 6%.

513
